# Supplementary material for: Titanate nanotubes-bonded organosulfonic acid as solid acid catalyst for synthesis of butyl levulinate
Source: Royal Society of Chemistry journal article supplement (doi:10.1039/c7ra12994g), 2018-01-01
Supplement: c7ra12994g1.pdf [file c7ra12994g1.pdf]

## Supplementary information

### **Titanate Nanotubes-bonded organosulfonic acid as solid acid catalyst for synthesis of butyl levulinate**

Shuolin Zhou,<sup>a,b</sup> Dabo Jiang,<sup>a</sup> Xianxiang Liu,<sup>a</sup> Yiping Chen,<sup>a</sup> and Dulin Yin<sup>a,\*</sup>

<sup>a</sup> National & Local Joint Engineering Laboratory for New Petro-chemical Materials and Fine Utilization of Resources; College of Chemistry and Chemical engineering, Hunan Normal University

<sup>b</sup> Junior Education Department, Cangsha Normal University

Corresponding author:

E-mail: [dulinyin@126.com](mailto:dulinyin@126.com) (D. Yin) Telephone: +86 731-88872576; fax: +86 731-88872531

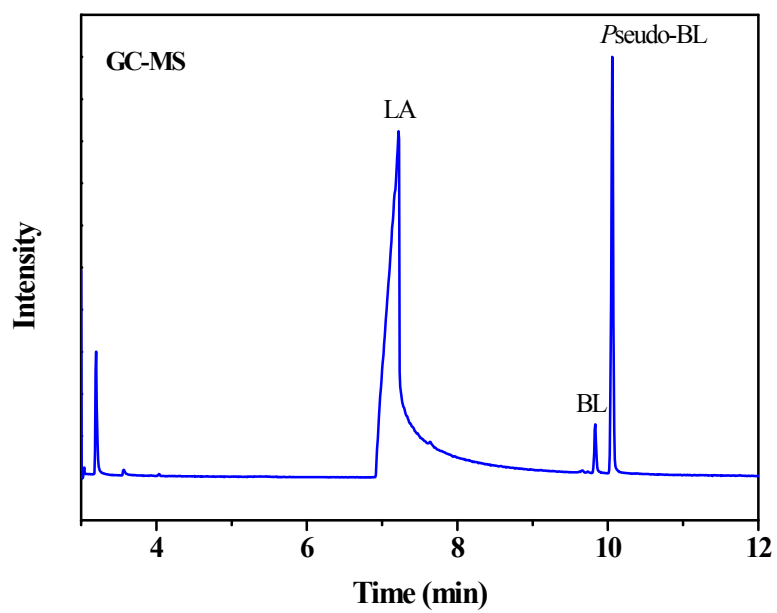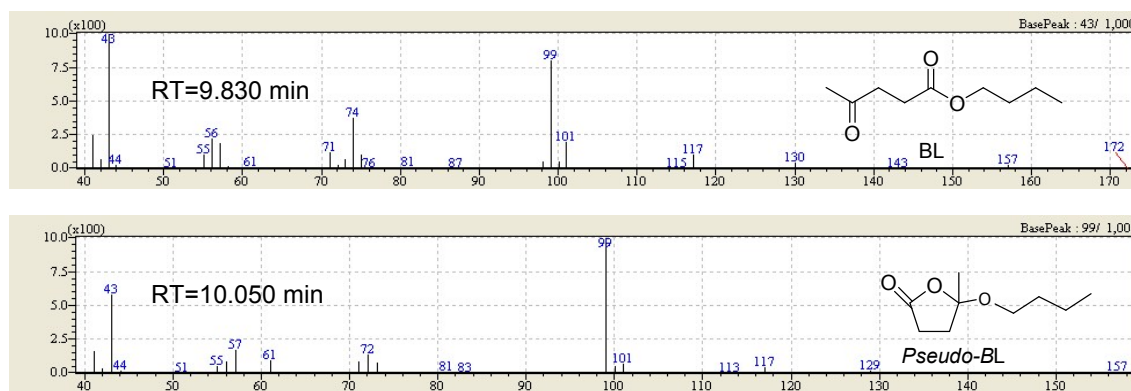

Fig.S1. Typical GC-MS spectra of BL and *Pseudo-BL*

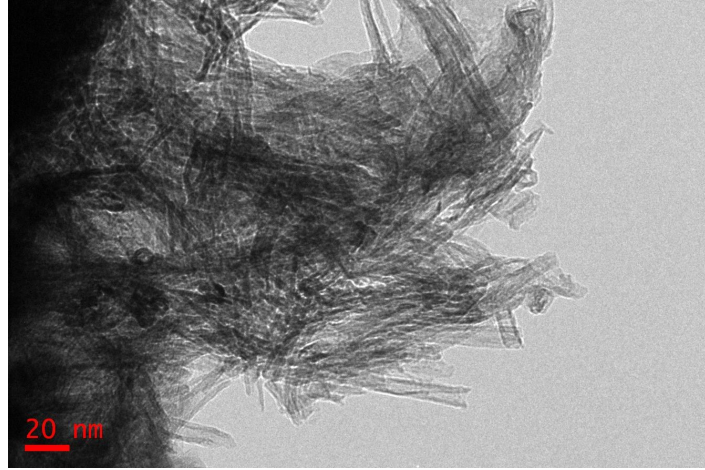

Fig.S2 TEM image of used TNTs-SO<sub>3</sub>H

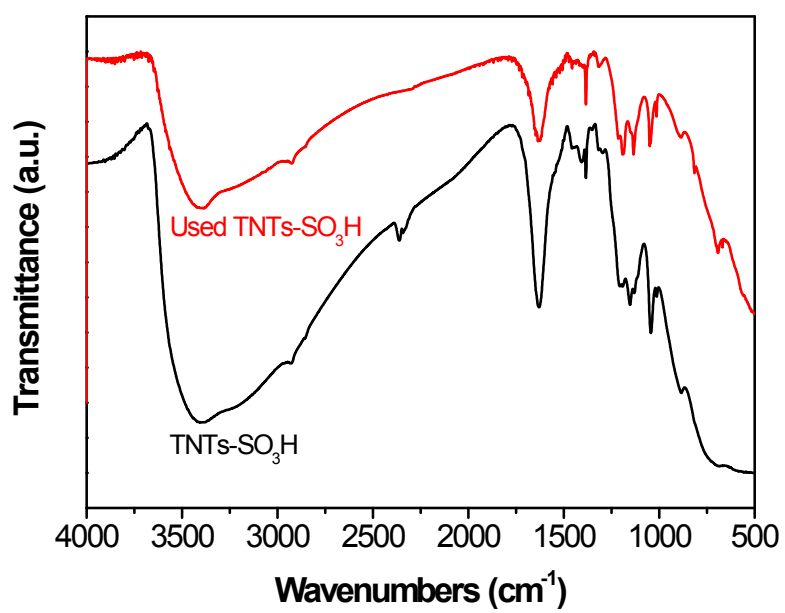

**Fig.S3** FT-IR spectrum of TNTs-SO<sub>3</sub>H and used TNTs-SO<sub>3</sub>H
